# Supplementary material
Source: Springer Nature journal article supplement (https://www.springermedizin.de/resource/supplementary/12967_2011_731_MOESM4_ESM.pdf/9577388)
Supplement: MOESM4 [file 9577388]

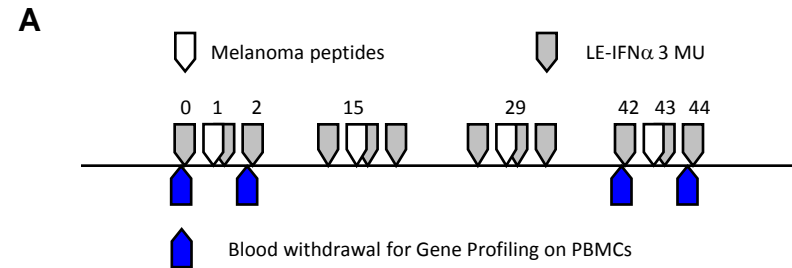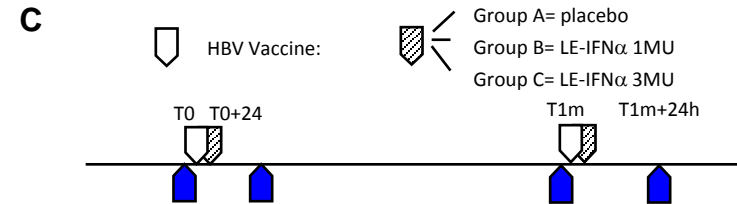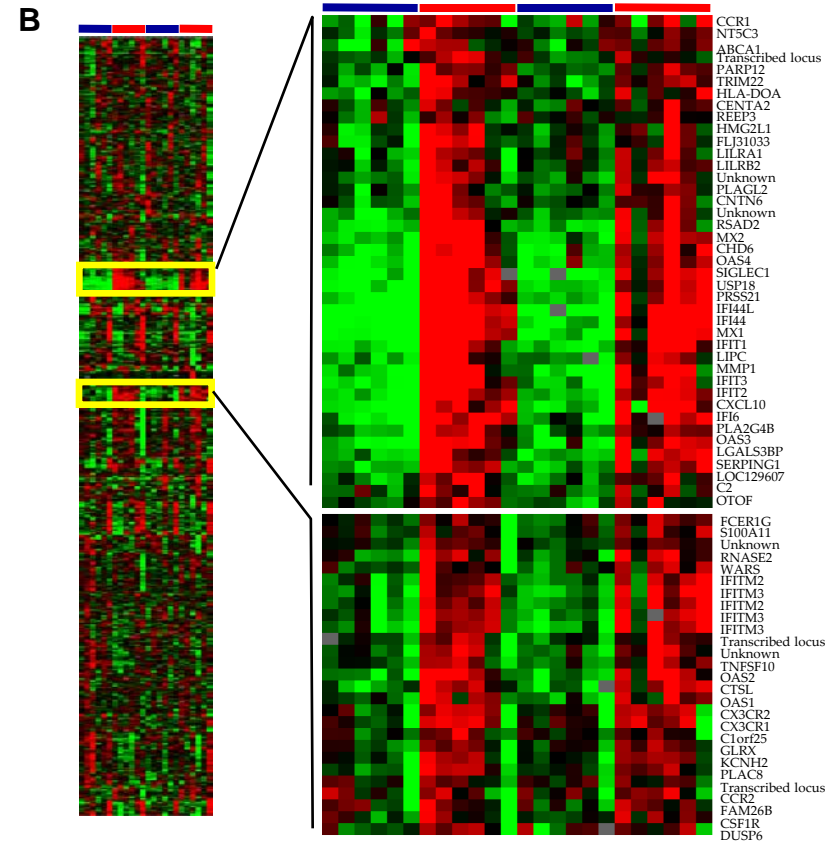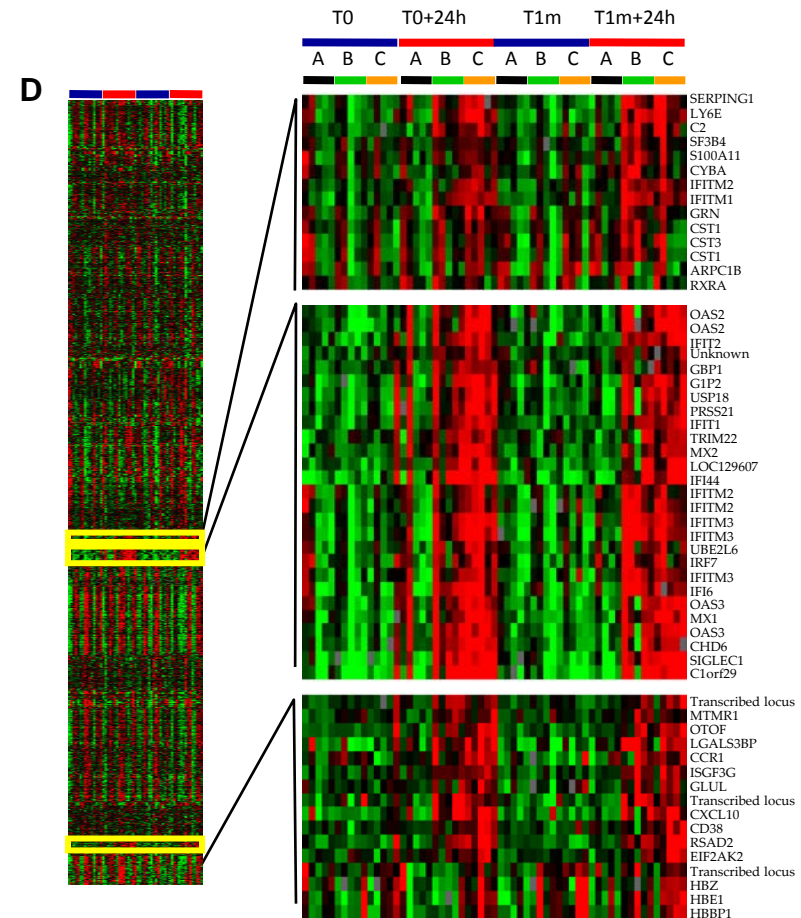

█ Pre Tx  
█ Post Tx  
█ Group C (HBV Vaccine + 3MU LE-IFN $\alpha$ )  
█ Group B (HBV Vaccine + 1MU LE-IFN $\alpha$ )  
█ Group A (HBV Vaccine + *Placebo*)
